# Supplementary material for: Zinc Oxide Nanoparticles Cytotoxicity and Release from Newly Formed PMMA–ZnO Nanocomposites Designed for Denture Bases
Source: PubMed Central journal article supplement (PMC6781076; doi:10.3390/nano9091318), 2019-09-15
Supplement: nanomaterials-09-01318-s001.pdf [file nanomaterials-09-01318-s001.pdf]

Supplementary Materials

# Zinc Oxide Nanoparticles Cytotoxicity and Release from Newly Formed PMMA–ZnO Nanocomposites Designed for Denture Bases

Mariusz Cierech <sup>1,\*</sup>, Jacek Wojnarowicz <sup>2</sup>, Adam Kolenda <sup>1</sup>, Agata Krawczyk-Balska <sup>3</sup>, Emilia Prochwicz <sup>3</sup>, Bartosz Woźniak <sup>2</sup>, Witold Łojkowski <sup>2</sup> and Elżbieta Mierzwińska-Nastalska <sup>1</sup>

<sup>1</sup> Department of Prosthodontics, Medical University of Warsaw, Warsaw 02-006, Poland

<sup>2</sup> Institute of High Pressure Physics, Polish Academy of Sciences, Warsaw 01-142, Poland

<sup>3</sup> Department of Applied Microbiology, Biological and Chemical Research Centre, Faculty of Biology, University of Warsaw, Warsaw 02-089, Poland

\* Correspondence: mariusz.cierech@wp.pl; Tel.: +48-22-502-18-86

**Table S1.** Characteristics of ZnO-NPs.

| Sample  | Specific surface area (SSA), $a_s \pm \sigma$ (m <sup>2</sup> /g) | Skeleton density, $\rho_s \pm \sigma$ (g/cm <sup>3</sup> ) | Average particle size from SSA BET, $d \pm \sigma$ (nm) | Average crystalite size, Scherer's formula (nm) | Average grain size, Nanopowder XRD Processor Demo, $d \pm \sigma$ (nm) |
|---------|-------------------------------------------------------------------|------------------------------------------------------------|---------------------------------------------------------|-------------------------------------------------|------------------------------------------------------------------------|
| ZnO-NPs | $39.8 \pm 0.2$                                                    | $5.17 \pm 0.05$                                            | 29                                                      | $27 \pm 2$                                      | $26 \pm 8$                                                             |

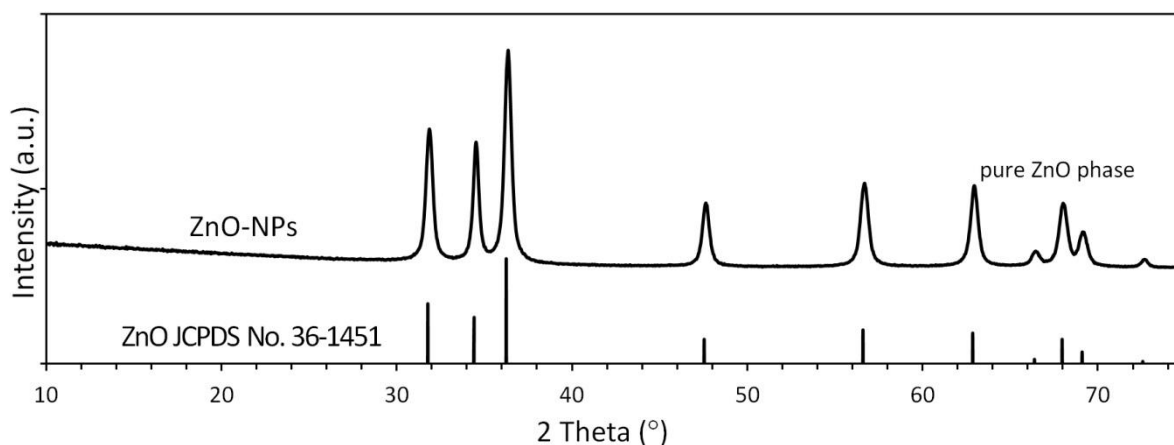

**Figure S1.** X-ray diffraction pattern of ZnO-NPs.
